# Supplementary material for: Growth Kinetics and Sensing Features of Colloidal Silver Nanoplates
Source: Hindawi journal article supplement (doi:10.1155/2019/7084731), 2019-01-15
Supplement: f1 [file 7084731.f1.pdf]

## Supplementary material

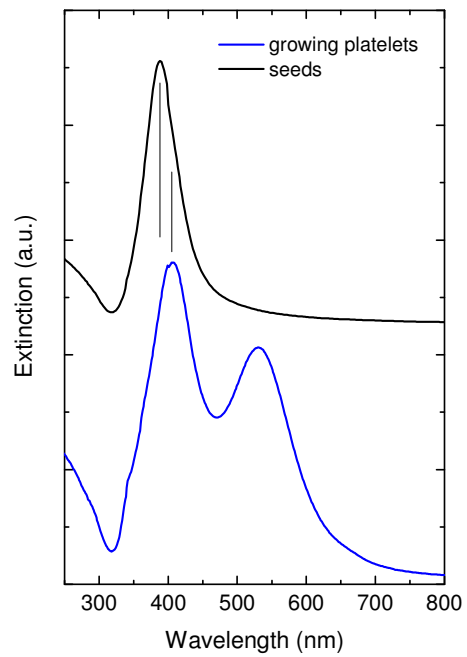

Figure S1: Spherical particles forming during secondary nucleation and growth give a characteristic signal which is markedly shifted towards the red with respect to small silver nanoparticles.

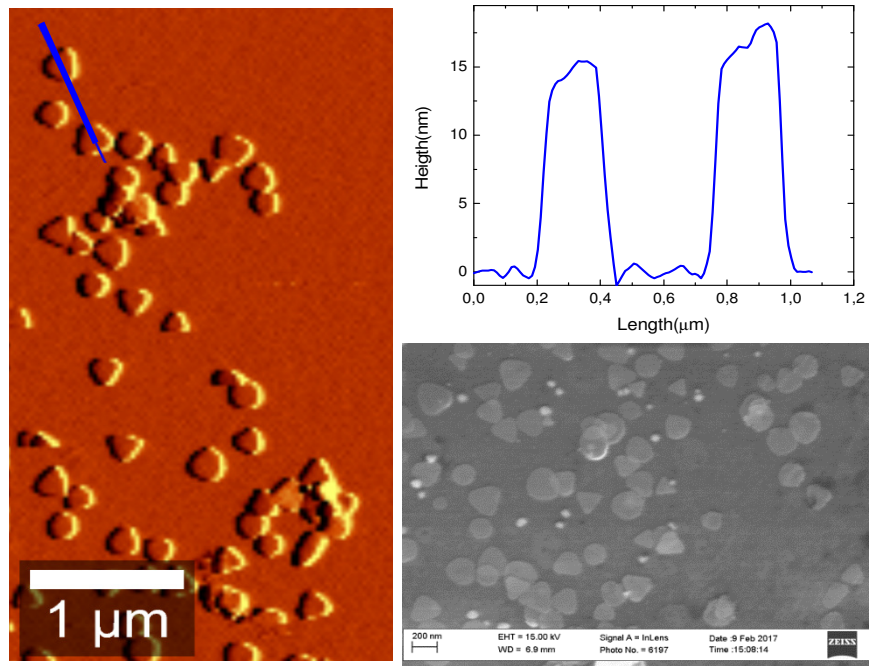

Figure S2: (a) AFM image and profile of Platelets obtained with 20  $\mu\text{l}$  of seed solution once the colloid is suitably deposited onto a flat surface (b) SEM image of the same colloids.

| <b>Sucrose concentration<br/>% w/w</b> | <b>Refractive index<br/>- n</b> |
|----------------------------------------|---------------------------------|
| 0.00                                   | 1.3330                          |
| 10.00                                  | 1.3478                          |
| 20.00                                  | 1.3639                          |
| 30.00                                  | 1.3812                          |
| 40.00                                  | 1.3999                          |
| 50.00                                  | 1.4201                          |
| 60.00                                  | 1.4419                          |
| 70.00                                  | 1.4654                          |
| 80.00                                  | 1.4958                          |

Table S1: Refractive index of a sucrose aqueous solution as a function of the concentration

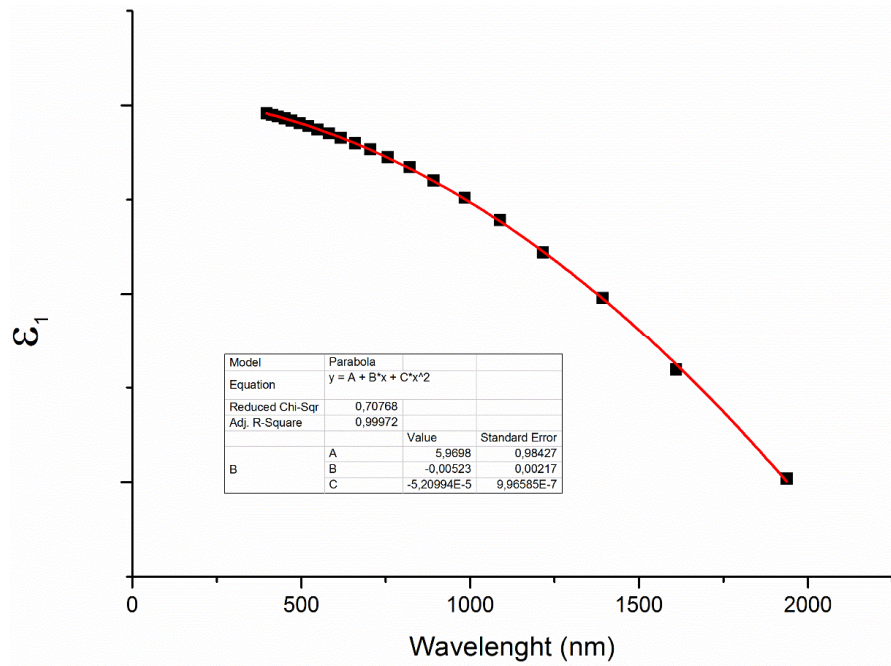

Figure S3: Fit of  $\epsilon''(\lambda)$  using Equation 2 in the wavelength interval of interest (300-2000 nm)
